# Supplementary material
Source: Springer Nature journal article supplement (https://www.springermedizin.de/resource/supplementary/12939_2013_375_MOESM2_ESM.pdf/9551020)
Supplement: MOESM2 [file 9551020]

Additional File 2

**Table 8. Relative odds of self-reported racial discrimination in the last 12 months by the police, security people, lawyers or in a court of law, Indigenous Australians aged 15 years and over, 2008-09.**<sup>†,‡</sup>

|                                          | Model 1§<br>OR (95% CI) | Model 2§<br>OR (95% CI) | Model 3§<br>OR (95% CI) | Model 4§<br>OR (95% CI) |
|------------------------------------------|-------------------------|-------------------------|-------------------------|-------------------------|
| Married                                  | 0.7 (0.5-0.9)**         | 0.8 (0.6-1.0)           | ---                     | 0.9 (0.7-1.2)           |
| Remote area residence                    | 0.8 (0.6-1.0)           | 0.7 (0.5-0.9)*          | ---                     | 0.4 (0.3-0.6)***        |
| Highest qualification                    |                         |                         |                         |                         |
| University degree                        | 1.6 (0.8-3.2)           | 2.1 (1.0-4.5)*          | ---                     | 1.8 (0.8-3.7)           |
| Diploma/certificate                      | 1.2 (0.9-1.8)           | 1.4 (0.9-2.0)           | ---                     | 1.3 (0.9-2.0)           |
| Year 12 only                             | 0.7 (0.4-1.1)           | 0.8 (0.5-1.4)           | ---                     | 0.9 (0.5-1.6)           |
| Year 10/11 only                          | 1.0                     | 1.0                     | ---                     | 1.0                     |
| <Year 10 only                            | 1.4 (1.0-2.0)           | 1.3 (0.9-1.8)           | ---                     | 1.2 (0.8-1.9)           |
| Labour force status                      |                         |                         |                         |                         |
| Employed                                 | 1.0                     | 1.0                     | ---                     | 1.0                     |
| Unemployed                               | 2.3 (1.5-3.4)***        | 2.0 (1.4-2.9)***        | ---                     | 1.8 (1.2-2.8)**         |
| Not in labour force                      | 1.4 (1.0-1.9)*          | 1.2 (0.9-1.6)           | ---                     | 1.2 (0.8-1.6)           |
| Home owned or being<br>purchased         | 0.5 (0.3-0.6)***        | 0.4 (0.3-0.7)***        | ---                     | 0.6 (0.4-0.9)*          |
| Equivalised household<br>income quintile |                         |                         |                         |                         |
| 1 (lowest)                               | 1.0                     | 1.0                     | ---                     | 1.0                     |
| 2                                        | 0.7 (0.5-1.0)*          | 0.9 (0.6-1.3)           | ---                     | 0.9 (0.6-1.4)           |
| 3                                        | 0.8 (0.5-1.3)           | 1.1 (0.7-1.8)           | ---                     | 1.3 (0.8-2.1)           |
| 4                                        | 0.5 (0.2-0.9)*          | 0.7 (0.3-1.5)           | ---                     | 0.9 (0.4-1.8)           |
| 5 (highest)                              | 1.3 (0.4-4.0)           | 1.9 (0.6-6.5)           | ---                     | 2.6 (0.6-11.1)          |

|                                                    |                  |               |                  |                  |
|----------------------------------------------------|------------------|---------------|------------------|------------------|
| Not known/Not stated                               | 0.9 (0.6-1.2)    | 1.1 (0.8-1.5) | ---              | 1.1 (0.8-1.6)    |
| SEIFA quintile                                     |                  |               |                  |                  |
| 1 (most disadvantaged)                             | 1.0              | 1.0           | ---              | 1.0              |
| 2                                                  | 1.2 (0.8-1.8)    | 1.2 (0.8-1.8) | ---              | 1.5 (1.0-2.2)*   |
| 3                                                  | 0.6 (0.4-0.9)*   | 0.6 (0.4-1.0) | ---              | 0.8 (0.5-1.3)    |
| 4                                                  | 1.1 (0.6-2.1)    | 1.3 (0.7-2.3) | ---              | 1.7 (0.9-3.2)    |
| 5                                                  | 0.6 (0.3-1.5)    | 0.8 (0.3-2.0) | ---              | 0.9 (0.3-2.5)    |
| Main language not                                  | 0.8 (0.6-1.2)    | ---           | 0.4 (0.2-0.5)*** | 0.7 (0.4-1.0)    |
| English                                            |                  |               |                  |                  |
| Household members all                              | 2.2 (1.6-2.9)*** | ---           | 1.4 (1.0-2.0)    | 1.2 (0.8-1.9)    |
| Indigenous                                         |                  |               |                  |                  |
| Identifies with clan, tribal,<br>language group    | 2.5 (1.8-3.5)*** | ---           | 1.7 (1.2-2.4)**  | 1.6 (1.1-2.3)*   |
| Identifies homelands                               | 2.5 (1.7-3.5)*** | ---           | 1.3 (0.9-2.0)    | 1.4 (0.9-2.1)    |
| Participated in cultural<br>events, past 12 months | 2.7 (1.9-3.7)*** | ---           | 1.7 (1.1-2.6)*   | 1.9 (1.2-2.8)**  |
| Taken away from natural<br>family                  | 3.0 (2.1-4.1)*** | ---           | 2.5 (1.7-3.6)*** | 2.2 (1.5-3.3)*** |
| % friends who are                                  |                  |               |                  |                  |
| Indigenous                                         |                  |               |                  |                  |
| Most or all                                        | 1.0              | ---           | 1.0              | 1.0              |
| About half                                         | 0.6 (0.4-0.9)*   | ---           | 0.6 (0.4-0.9)*   | 0.5 (0.3-0.7)**  |
| Few                                                | 0.3 (0.2-0.4)*** | ---           | 0.4 (0.2-0.5)*** | 0.3 (0.2-0.4)*** |
| Level of trust                                     |                  |               |                  |                  |
| High                                               | 1.0              | ---           | 1.0              | 1.0              |

|        |                  |     |                  |                  |
|--------|------------------|-----|------------------|------------------|
| Medium | 1.5 (1.1-2.0)*   | --- | 1.4 (1.0-2.0)*   | 1.3 (0.9-1.9)    |
| Low    | 2.6 (1.9-3.5)*** | --- | 2.7 (2.0-3.6)*** | 2.6 (2.0-3.5)*** |

† Source: Weighted data from the National Aboriginal and Torres Strait Islander Social Survey 2008-09 confidentialised unit record file (CURF) [11,12].

‡ Includes only those with complete data on all variables of interest. Comparison group is those reporting no discrimination in any setting (total N=5,869).

§ Model 1: Adjusted for age group and sex and the variable shown.

Model 2: Adjusted for age group, sex and the socio-demographic variables listed.

Model 3: Adjusted for age group, sex, and the cultural variables listed.

Model 4: Adjusted for age group, sex, and the socio-demographic and cultural variables listed.

\*  $p < 0.05$ ; \*\*  $p < 0.01$ ; \*\*\*  $p < 0.001$
